# Supplementary material for: Hydrodeoxygenation of Oxygenates Derived from Biomass Pyrolysis Using Titanium Dioxide-Supported Cobalt Catalysts
Source: MDPI journal article supplement (doi:10.3390/molecules28227468), 2023-11-07
Supplement: s1 [file s1]

## Supplementary files

# Hydrodeoxygenation of Oxygenates Derived from Biomass Pyrolysis Using Titanium Dioxide-Supported Cobalt Catalysts

Surachet Hongkailers <sup>1</sup>, Adisak Pattiya <sup>2</sup> and Napida Hinchiranan <sup>1,3,4,\*</sup>

<sup>1</sup> Department of Chemical Technology, Faculty of Science, Chulalongkorn University, 254 Phyathai Road, Bangkok 10330, Thailand; surachet.hkl@gmail.com

<sup>2</sup> Bio-Energy and Renewable Resources Research Unit, Faculty of Engineering, Mahasarakham University, Kamriang, Kantharawichai, Maha Sarakham 44150, Thailand; adisak\_pattiya@yahoo.com

<sup>3</sup> Center of Excellence on Petrochemical and Materials Technology (PETROMAT), Chulalongkorn University, 254 Phyathai Road, Bangkok 10330, Thailand

<sup>4</sup> Center of Excellence in Catalysis for Bioenergy and Renewable Chemicals (CBRC), Chulalongkorn University, 254 Phyathai Road, Bangkok 10330, Thailand

\* Correspondence: napida.h@chula.ac.th

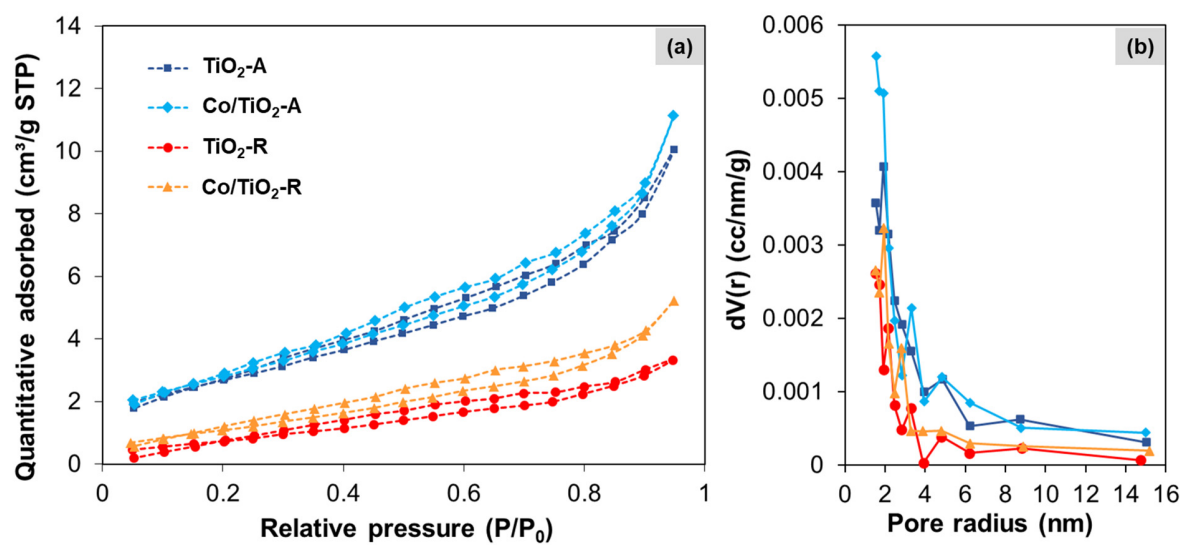

**Figure S1.** (a) N<sub>2</sub> adsorption-desorption isotherms and (b) pore size distribution of the TiO<sub>2</sub> supports and Co/TiO<sub>2</sub> catalysts.

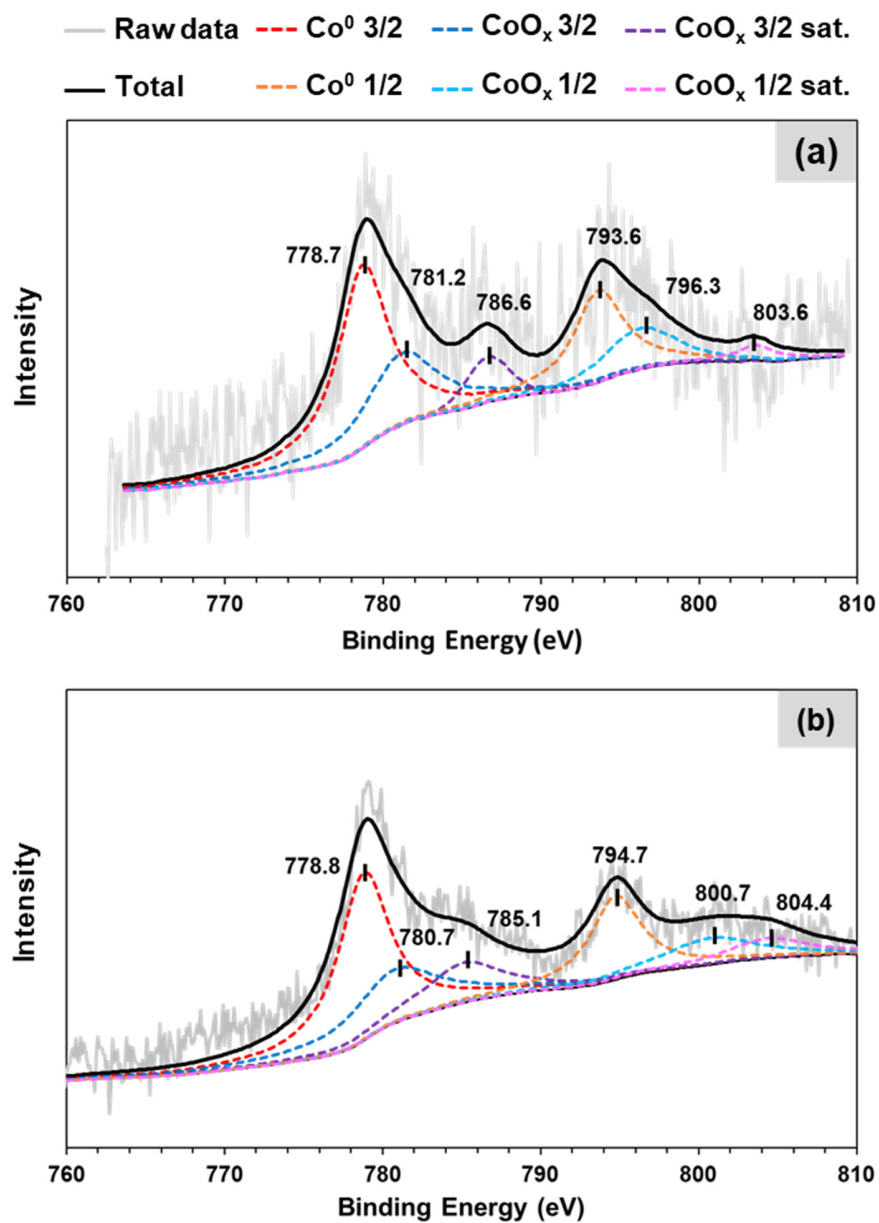

**Figure S2.** Representative deconvoluted Co 2p XPS spectra of the reduced (a) Co/TiO<sub>2</sub>-A and (b) Co/TiO<sub>2</sub>-R catalysts.

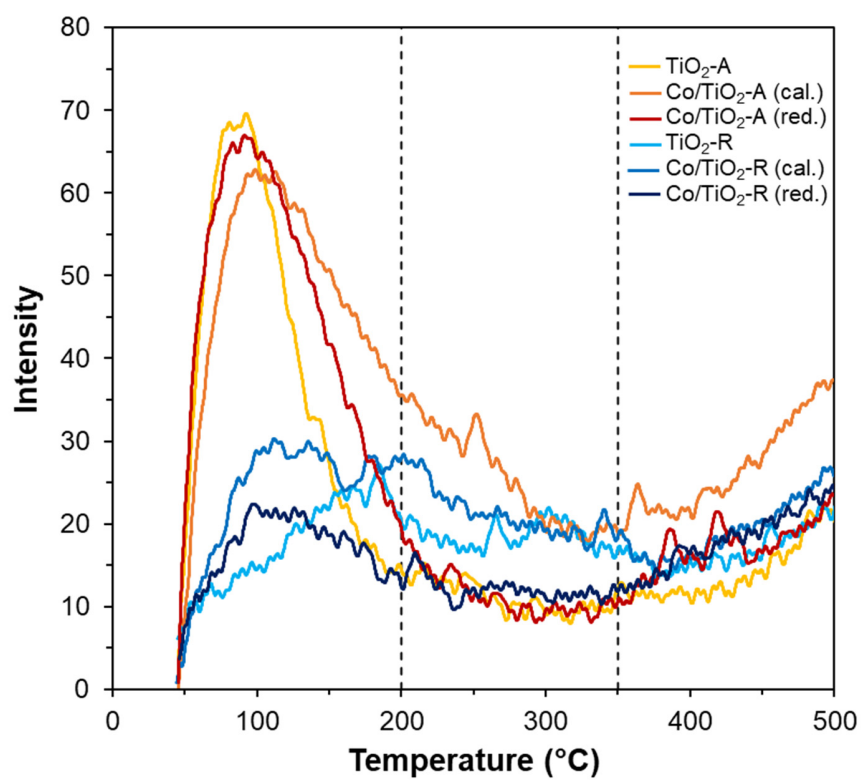

**Figure S3.** Representative NH<sub>3</sub>-TPD profiles of the TiO<sub>2</sub> supports and Co/TiO<sub>2</sub> catalysts in both calcined and reduced forms.

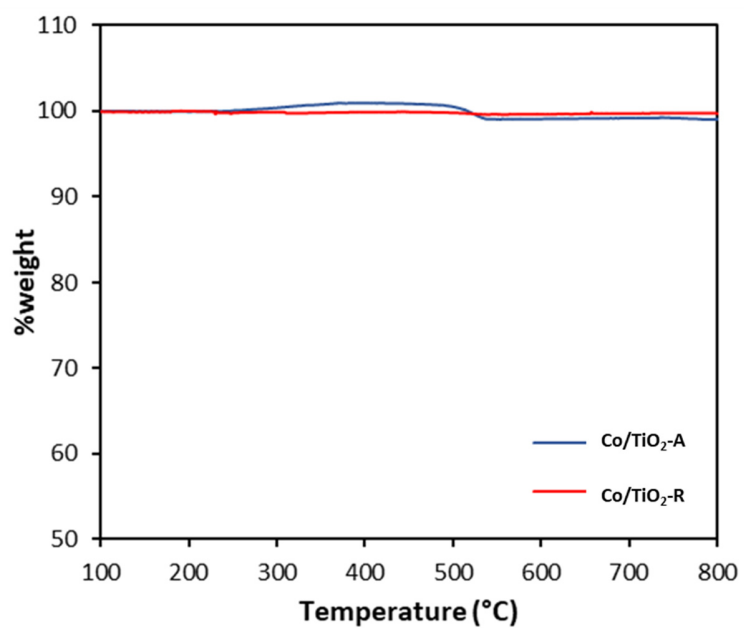

**Figure S4.** Representative TGA profiles of the spent Co/TiO<sub>2</sub>-A and Co/TiO<sub>2</sub>-R catalysts after the fourth consecutive run.

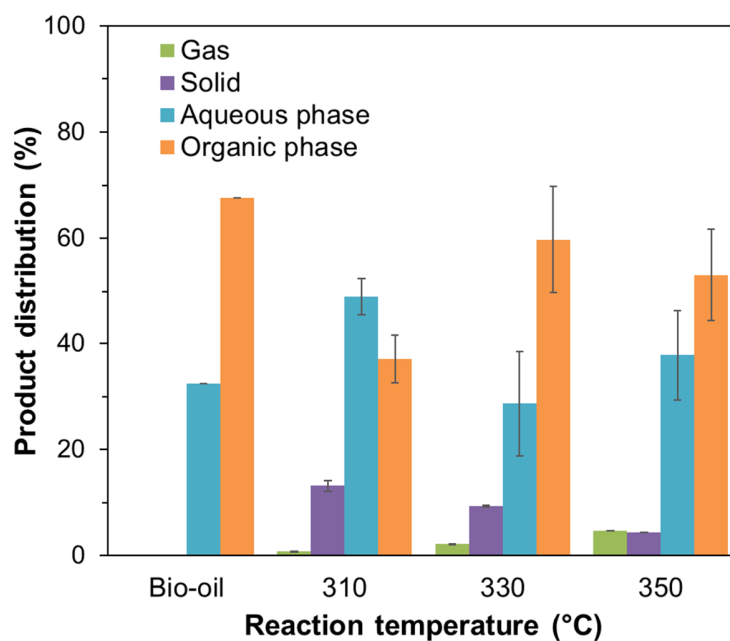

**Figure S5.** Distribution of compounds found in the bio-oil before and after HDO over the Co/TiO<sub>2</sub>-A catalyst at different reaction temperatures (Condition: 30 bar initial H<sub>2</sub> pressure and 4 h).

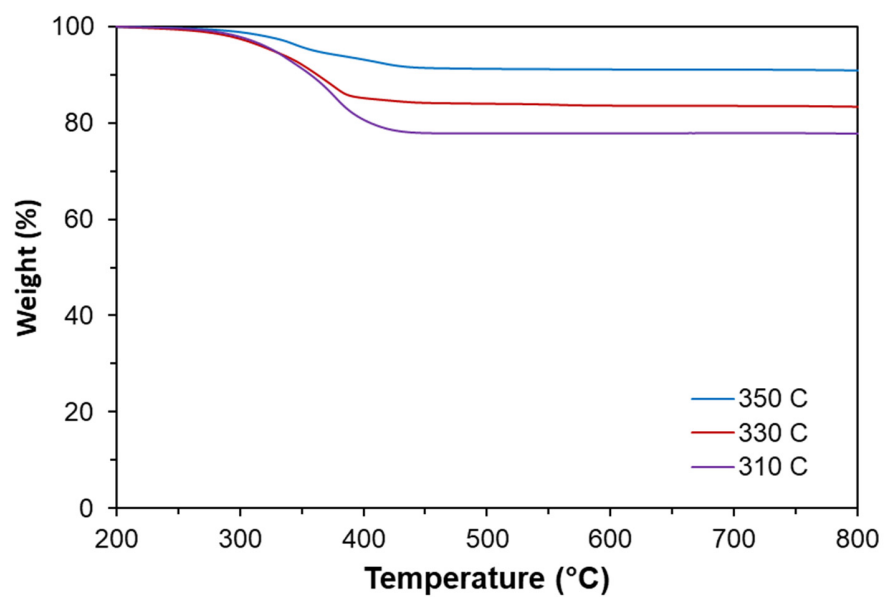

**Figure S6.** Representative TGA profiles of the spent Co/TiO<sub>2</sub>-A catalysts obtained from the HDO of bio-oil at different reaction temperatures (Condition: 30 bar initial H<sub>2</sub> pressure and 4 h).

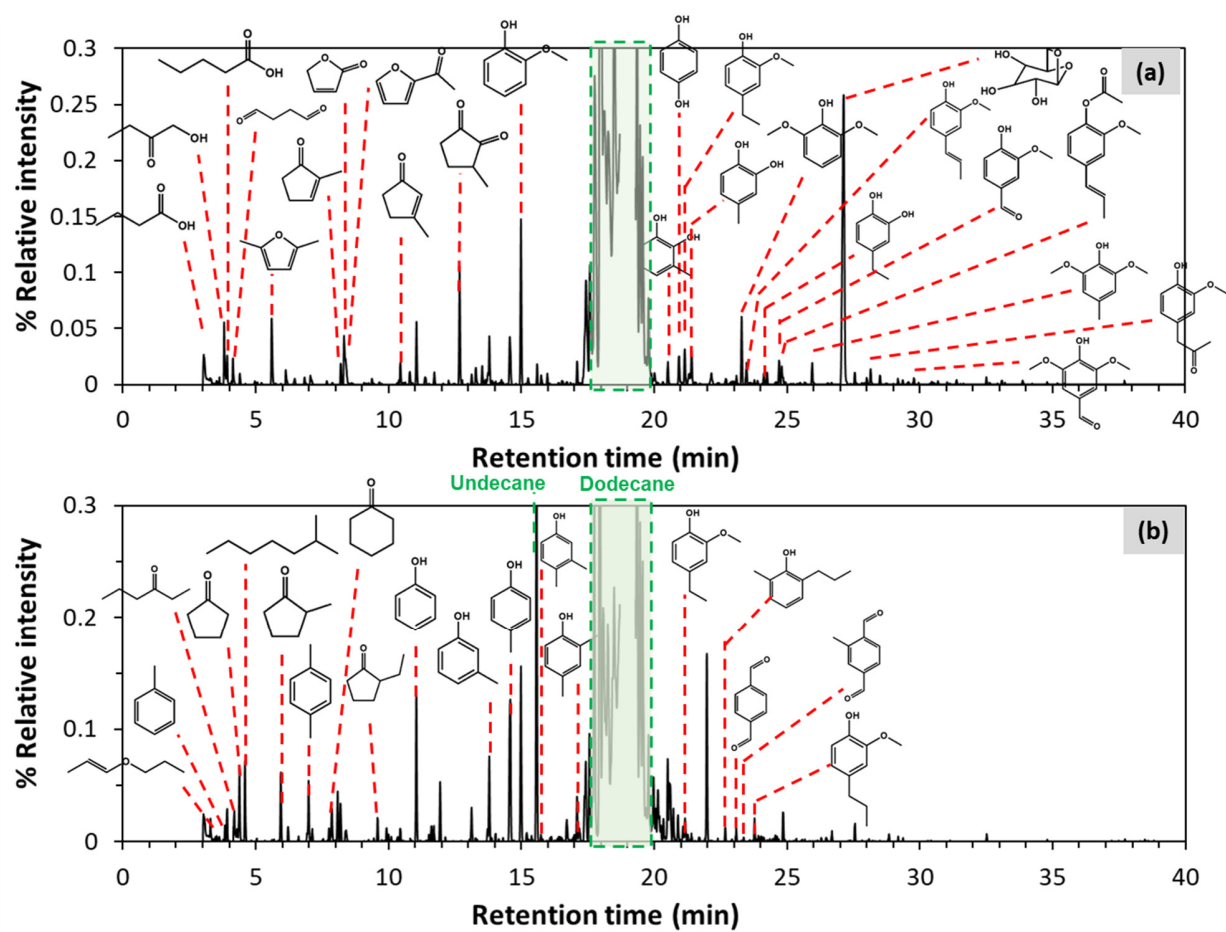

**Figure S7.** Representative GC-MS chromatograms of the (a) bio-oil in n-dodecane and (b) the liquid product obtained from HDO process using Co/TiO<sub>2</sub>-A catalyst operated under 30 initial H<sub>2</sub> pressure at 350 °C for 4 h.

**Table S1.** Conversion level and product yield from the HDO of several lignin-derived model compounds over Co/TiO<sub>2</sub> catalysts.

| Substrate                                                                                                          | Catalyst               | Conversion (%) | Product yield (%)                                                                           |                                                                                            |                                                                                               |                                                                                              |                                                                                              |
|--------------------------------------------------------------------------------------------------------------------|------------------------|----------------|---------------------------------------------------------------------------------------------|--------------------------------------------------------------------------------------------|-----------------------------------------------------------------------------------------------|----------------------------------------------------------------------------------------------|----------------------------------------------------------------------------------------------|
| 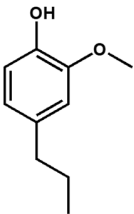<br>4PG                           | Co/TiO <sub>2</sub> -A | 99.8           | <br>48.3   | <br>3.0   | <br>40.5   | <br>0.8   |                                                                                              |
|                                                                                                                    | Co/TiO <sub>2</sub> -R | 99.9           | <br>43.4   | <br>6.8   | <br>41.1   | <br>0.5   |                                                                                              |
| <br>Phenol                        | Co/TiO <sub>2</sub> -A | 99.7           | <br>18.0   | <br>82.0  |                                                                                               |                                                                                              |                                                                                              |
|                                                                                                                    | Co/TiO <sub>2</sub> -R | 100            | <br>23.9  | <br>76.1 |                                                                                               |                                                                                              |                                                                                              |
| <br>4-Allyl-2-methoxyphenol     | Co/TiO <sub>2</sub> -A | 100            | <br>16.4 | <br>2.0 | <br>73.0 | <br>0.3 | <br>1.0 |
|                                                                                                                    | Co/TiO <sub>2</sub> -R | 100            | <br>16.1 | <br>2.2 | <br>69.6 | <br>0.3 | <br>0.8 |
| <br>4-Allyl-2,6-dimethoxyphenol | Co/TiO <sub>2</sub> -A | 99.0           | <br>6.8  | <br>1.8 | <br>59.0 | <br>2.5 | <br>1.7 |
|                                                                                                                    | Co/TiO <sub>2</sub> -R | 99.8           | <br>23.7 | <br>6.2 | <br>48.5 | <br>1.8 | <br>1.1 |

Condition: 30 bar initial H<sub>2</sub> pressure at 310 °C for 1 h using 300 mg substrate, 150 mg catalyst, and 4 mL n-dodecane

**Table S2.** The Co content in the fresh and spent catalysts obtained after the fourth consecutive run.

| Sample                 | Co content (wt%) |                |
|------------------------|------------------|----------------|
|                        | Fresh catalyst   | Spent catalyst |
| Co/TiO <sub>2</sub> -A | 4.92             | 4.55           |
| Co/TiO <sub>2</sub> -R | 4.59             | 2.20           |

**Table S3.** Types and contents of chemical species found in the bio-oil obtained from the fast pyrolysis of *L. leucocephala* trunk before and after HDO over the Co/TiO<sub>2</sub>-A catalyst (detection by GC-MS analysis).

| RT (min)                  | Component                           | Relative peak area (%) |                                   |
|---------------------------|-------------------------------------|------------------------|-----------------------------------|
|                           |                                     | Bio-oil                | Hydrotreated bio-oil <sup>a</sup> |
| Non-oxygenated aliphatics |                                     |                        |                                   |
| 4.60                      | i-Octane                            | n.d.                   | 4.82                              |
| 7.75                      | 1,2-Dimethylcyclopentane            | n.d.                   | 0.76                              |
| 11.61                     | 3,5-Dimethyl-1-hexene               | n.d.                   | 0.93                              |
| Oxygenated aliphatics     |                                     |                        |                                   |
| 3.28                      | Butanoic acid                       | 1.09                   | n.d.                              |
| 3.29                      | 1-Propenyl propyl ether             | n.d.                   | 2.22                              |
| 3.81                      | 1-Hydroxy-2-butanone                | 3.02                   | n.d.                              |
| 3.92                      | Pentanoic acid                      | 1.46                   | 2.35                              |
| 4.14                      | Butanedial                          | 1.29                   | n.d.                              |
| 4.19                      | 3-Hexanone                          | n.d.                   | 2.56                              |
| 4.30                      | 2-Hexanone                          | n.d.                   | 1.00                              |
| 4.40                      | Cyclopentanone                      | 0.53                   | 4.77                              |
| 5.94                      | 2-Methylcyclopentanone              | n.d.                   | 4.35                              |
| 6.22                      | 3-Methylcyclopentanone              | n.d.                   | 0.91                              |
| 7.13                      | Hexanoic acid                       | n.d.                   | 0.91                              |
| 7.86                      | Cyclohexanone                       | n.d.                   | 2.61                              |
| 8.20                      | 2-Methyl-2-cyclopentenone           | 1.15                   | 2.61                              |
| 9.44                      | 2-Methyl-4-hexene-3-one             | n.d.                   | 0.20                              |
| 9.59                      | 2-Ethylcyclopentanone               | n.d.                   | 1.43                              |
| 9.92                      | 2-Methylcyclohexanone               | n.d.                   | 0.47                              |
| 10.44                     | 3-Methyl-2-cyclopentenone           | 1.18                   | 0.92                              |
| 11.51                     | 3,5-Heptadien-2-one                 | n.d.                   | 0.39                              |
| 11.72                     | 3-Methylcyclohexenone-1-one         | 0.63                   | 0.93                              |
| 12.67                     | 3-Methyl-1,2-cyclopentanedione      | 6.20                   | n.d.                              |
| 13.12                     | 2,3-Dimethyl-2-cyclopenten-1-one    | 0.37                   | 2.23                              |
| 13.52                     | 2,2-Dimethyl-3-heptanone            | 0.86                   | n.d.                              |
| 13.87                     | 3-Methylcyclohexanone               | n.d.                   | 0.79                              |
| 15.73                     | 3-Hydroxy-2-methyl-4H-Pyran-4-one   | 0.44                   | n.d.                              |
| 22.93                     | Isobutyric acid anhydride           | 0.03                   | n.d.                              |
| 24.25                     | 1,1-Dimethylpropyl 2-ethylhexanoate | 0.61                   | n.d.                              |
| Non-oxygenated aromatics  |                                     |                        |                                   |
| 3.84                      | Toluene                             | n.d.                   | 0.80                              |
| 6.99                      | p-Xylene                            | n.d.                   | 3.54                              |

Table S3. (Continued)

| RT (min)             | Component                            | Content (mmol/g <sub>bio-oil</sub> ) |                                   |
|----------------------|--------------------------------------|--------------------------------------|-----------------------------------|
|                      |                                      | Bio-oil                              | Hydrotreated bio-oil <sup>a</sup> |
| Oxygenated aromatics |                                      |                                      |                                   |
| 11.04                | Phenol                               | 3.19                                 | 9.79                              |
| 13.79                | 3-Methylphenol                       | 2.11                                 | 5.47                              |
| 14.55                | 4-Methylphenol                       | 3.52                                 | 14.41                             |
| 14.98                | 2-Methoxyphenol                      | 9.09                                 | 12.75                             |
| 15.72                | 3,4-Dimethylphenol                   | n.d.                                 | 0.36                              |
| 17.09                | 2,4-Dimethylphenol                   | 1.20                                 | 3.04                              |
| 17.17                | 3,5-Dimethylphenol                   | n.d.                                 | 1.29                              |
| 17.67                | 4-(2-Hydroxyethyl)phenol             | 0.50                                 | 2.62                              |
| 20.52                | 3-Methyl-1,2-benzenediol             | 1.22                                 | n.d.                              |
| 20.94                | 1,4-Benzenediol                      | 1.87                                 | n.d.                              |
| 21.15                | 4-Ethyl-2-methoxyphenol              | 2.18                                 | 1.68                              |
| 21.26                | 1,3-Benzenediol                      | n.d.                                 | 0.35                              |
| 21.41                | 4-Methyl-1,2-benzenediol             | 2.28                                 | 0.29                              |
| 22.67                | 2-Methyl-6-propylphenol              | n.d.                                 | 0.86                              |
| 23.09                | 1,4-Benzenedicarboxaldehyde          | n.d.                                 | 0.85                              |
| 23.10                | 5-Methyl-1,3-benzenediol             | 0.41                                 | n.d.                              |
| 23.30                | 2,6-Dimethoxyphenol                  | 3.66                                 | n.d.                              |
| 23.37                | 2-Methyl-1,4-benzenedicarboxaldehyde | n.d.                                 | 0.25                              |
| 23.48                | 4-(1-Propenyl)-2-methoxyphenol       | 1.18                                 | n.d.                              |
| 23.78                | 4-Propylguaiacol                     | n.d.                                 | 1.30                              |
| 24.13                | 4-Ethyl-1,2-benzenediol              | 0.55                                 | n.d.                              |
| 24.70                | 4-Hydroxy-3-methoxybenzaldehyde      | 1.39                                 | n.d.                              |
| 24.94                | 2-Methoxy-4-propenylphenyl acetate   | 0.07                                 | n.d.                              |
| 25.95                | 4-Methyl-2,6-dimethoxyphenol         | 1.05                                 | n.d.                              |
| 28.15                | 4-Hydroxy-3-methoxyphenyl acetone    | 0.81                                 | n.d.                              |
| 29.78                | 4-Hydroxy-3,5-dimethoxybenzaldehyde  | 0.34                                 | n.d.                              |
| Furan-ring compounds |                                      |                                      |                                   |
| 5.60                 | 2,5-Dimethylfuran                    | 3.81                                 | n.d.                              |
| 8.32                 | 2(5H)-Furanone                       | 2.85                                 | n.d.                              |
| 8.38                 | Acetylfuran                          | 1.73                                 | 1.27                              |
| 9.37                 | 5-Methyl-2(5H)-furanone              | 0.31                                 | n.d.                              |
| 10.38                | 5-Methylfurfural                     | 0.14                                 | 0.12                              |
| 10.79                | 3-Methyl-2(5H)-furanone              | 0.75                                 | n.d.                              |
| 11.37                | 3-Hydroxydihydro-2(3H)-furanone      | 0.58                                 | n.d.                              |
| 13.28                | 5-Hydroxymethyl-2(5H)-furanone       | 0.88                                 | n.d.                              |

**Table S3.** (Continued)

| RT (min)                              | Component                                              | Content (mmol/g <sub>bio-oil</sub> ) |                                   |
|---------------------------------------|--------------------------------------------------------|--------------------------------------|-----------------------------------|
|                                       |                                                        | Bio-oil                              | Hydrotreated bio-oil <sup>a</sup> |
| 14.02                                 | Tetrahydrofurfuryl alcohol                             | n.d.                                 | 0.46                              |
| 15.42                                 | Ethylfuran                                             | n.d.                                 | 0.33                              |
| 28.50                                 | 3,4-Dihydroxy-5-methyl-dihydrofuran-2-one              | 0.40                                 | n.d.                              |
| <b>Cellulose derivative compounds</b> |                                                        |                                      |                                   |
| 27.14                                 | 1,6-Anhydro- $\beta$ -D-glucopyranonose (levoglucosan) | 27.19                                | n.d.                              |
| <b>Total</b>                          |                                                        | <b>100.00</b>                        | <b>100.00</b>                     |

n.d. = could not be detected

<sup>a</sup> Obtained from HDO process operated at 350 °C under 30 bar initial H<sub>2</sub> pressure for 4 h

**Table S4.** Gas composition obtained from HDO of dodecane and bio-oil in dodecane.

| Condition <sup>a</sup>                     | Gas concentration (mol%) |                |                |                |      |                 |
|--------------------------------------------|--------------------------|----------------|----------------|----------------|------|-----------------|
|                                            | C <sub>1</sub>           | C <sub>2</sub> | C <sub>3</sub> | C <sub>4</sub> | CO   | CO <sub>2</sub> |
| Bio-oil in dodecane <sup>b</sup> at 310 °C | 0.07                     | 0.02           | 0.03           | 0.01           | 0.05 | 0.17            |
| Bio-oil in dodecane <sup>b</sup> at 330 °C | 0.10                     | 0.04           | 0.03           | 0.01           | 0.09 | 0.56            |
| Bio-oil in dodecane <sup>b</sup> at 350 °C | 0.26                     | 0.19           | 0.08           | 0.01           | 0.22 | 1.29            |
| Dodecane <sup>c</sup> at 350 °C            | 0.07                     | 0.04           | 0.01           | 0.00           | 0.00 | 0.00            |

<sup>a</sup>Reaction condition: 30 bar initial H<sub>2</sub> pressure, 4 h.; <sup>b</sup>Bio-oil/dodecane = 0.3 g/4 mL; <sup>c</sup>dodecane = 4 mL

**Table S5.** Compounds in each group of aromatic compounds found in the bio-oil before and after HDO over Co/TiO<sub>2</sub>-A catalyst, as detected by GC-MS analysis.

| Chemical                                                                            |                                                                                     |                                                                                     |                                                                                     |                                                                                      |                                                                                       |                                                                                     |
|-------------------------------------------------------------------------------------|-------------------------------------------------------------------------------------|-------------------------------------------------------------------------------------|-------------------------------------------------------------------------------------|--------------------------------------------------------------------------------------|---------------------------------------------------------------------------------------|-------------------------------------------------------------------------------------|
| <b>Non-oxygenated arenes</b>                                                        |                                                                                     |                                                                                     |                                                                                     |                                                                                      |                                                                                       |                                                                                     |
| 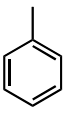   |    |    |    |    |                                                                                       |                                                                                     |
| toluene                                                                             | ethylbenzene                                                                        | p-xylene                                                                            | o-xylene                                                                            | 1-methyl-3-isopropylbenzene                                                          |                                                                                       |                                                                                     |
| <b>Phenols</b>                                                                      |                                                                                     |                                                                                     |                                                                                     |                                                                                      |                                                                                       |                                                                                     |
|    |    |    |    |    |    |  |
| phenol                                                                              | 2-methylphenol                                                                      | 3-methylphenol                                                                      | 4-methylphenol                                                                      | 3,4-dimethylphenol                                                                   | 2,5-dimethylphenol                                                                    | 3,5-dimethylphenol                                                                  |
|   |   |   |   |   |   |                                                                                     |
| 2,4-dimethylphenol                                                                  | 4-ethyl-2-methylphenol                                                              | 2-ethylphenol                                                                       | 4-propylphenol                                                                      | 2-methyl-6-propylphenol                                                              | 4-(2-hydroxyethyl)phenol                                                              |                                                                                     |
| <b>Methoxyphenols</b>                                                               |                                                                                     |                                                                                     |                                                                                     |                                                                                      |                                                                                       |                                                                                     |
|  |  |  |  |  |  |                                                                                     |
| 2-methoxyphenol                                                                     | 4-methyl-2-methoxyphenol                                                            | 4-ethyl-2-methoxyphenol                                                             | 2-ethoxyphenol                                                                      | 4-(1-propenyl)-2-methoxyphenol                                                       | 4-propyl-2-methoxyphenol                                                              |                                                                                     |
| <b>Dimethoxyphenols</b>                                                             |                                                                                     |                                                                                     |                                                                                     |                                                                                      |                                                                                       |                                                                                     |
|  |  |                                                                                     |                                                                                     |                                                                                      |                                                                                       |                                                                                     |
| 2,6-dimethoxyphenol                                                                 | 4-methyl-2,6-dimethoxyphenol                                                        |                                                                                     |                                                                                     |                                                                                      |                                                                                       |                                                                                     |

Table S5. (continued)

| Chemical                                                                            |                                                                                     |                                                                                     |                                                                                     |                                                                                      |                                                                                       |                                                                                      |
|-------------------------------------------------------------------------------------|-------------------------------------------------------------------------------------|-------------------------------------------------------------------------------------|-------------------------------------------------------------------------------------|--------------------------------------------------------------------------------------|---------------------------------------------------------------------------------------|--------------------------------------------------------------------------------------|
| Benzenediols                                                                        |                                                                                     |                                                                                     |                                                                                     |                                                                                      |                                                                                       |                                                                                      |
| 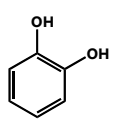   |    |    |    |    |    |   |
| 1,2-benzenediol                                                                     | 1,3-benzenediol                                                                     | 1,4-benzenediol                                                                     | 4-methyl-1,2-benzenediol                                                            | 4-ethyl-1,2-benzenediol                                                              | 5-ethyl-1,3-benzenediol                                                               | 5-methyl-1,3-benzenediol                                                             |
|    |    |                                                                                     |                                                                                     |                                                                                      |                                                                                       |                                                                                      |
| 1,4-benzendicarboxaldehyde                                                          | 2-methyl-1,4-benzendicarboxaldehyde                                                 |                                                                                     |                                                                                     |                                                                                      |                                                                                       |                                                                                      |
| Others                                                                              |                                                                                     |                                                                                     |                                                                                     |                                                                                      |                                                                                       |                                                                                      |
|  |  |  |  |  |  |  |
| 4-hydroxy-3-methoxybenzaldehyde                                                     | 3-hydroxy-4-methoxybenzoic acid                                                     | 3,4-dihydroxybenzoic acid                                                           | 2,6-dihydroxy-4-methoxyacetophenone                                                 | 4-hydroxy-3,5-dimethoxybenzaldehyde                                                  | 4-hydroxy-3-methoxyphenyl acetone                                                     | 2-methoxy-4-(1-propenyl)phenyl acetate                                               |

**Table S6.** Calibration data used for calculation of the HDO of all lignin-derived model compounds prepared by GC-FID analysis

| Component                  | Equation               | R <sup>2</sup> |
|----------------------------|------------------------|----------------|
| 4-Propylguaiacol           | $y = 0.9431x - 0.0048$ | 0.9999         |
| 4-Propylphenol             | $y = 0.8971x - 0.0064$ | 0.9998         |
| Propylbenzene              | $y = 1.0499x - 0.0102$ | 0.9999         |
| Propylcyclohexane          | $y = 1.0589x + 0.0074$ | 0.9999         |
| Cyclohexane                | $y = 0.789x - 0.0201$  | 0.9998         |
| Cyclohexanol               | $y = 0.6076x - 0.0006$ | 0.9999         |
| Eugenol                    | $y = 0.8971 - 0.0064$  | 0.9998         |
| 4-Ally-2,6-dimethoxyphenol | $y = 0.7851x - 0.0085$ | 0.9996         |

y = peak area of product (i)/peak area of internal standard;  
x = mol of product (i)/mol of internal standard
